# Supplementary material for: Erythronium japonicum Alleviates Inflammatory Pain by Inhibiting MAPK Activation and by Suppressing NF-κB Activation via ERK/Nrf2/HO-1 Signaling Pathway
Source: PubMed Central journal article supplement (PMC7402134; doi:10.3390/antiox9070626), 2020-07-16
Supplement: antioxidants-09-00626-s001.pdf [file antioxidants-09-00626-s001.pdf]

1 Supplementary Information for

2

3 ***Erythronium Japonicum* Alleviates Inflammatory Pain by Inhibiting MAPK Activation and by**  
4 **Suppressing NF- $\kappa$ B Activation via the ERK/Nrf2/HO-1 Signaling Pathway**

5

6 Joon Park 1,2 and Yun Tai Kim \*

7

8 \*Corresponding author. Email: ytkim@kfri.re.kr

9

10 This file includes:

11 Fig. S1. Effect of MAPK inhibitors on LPS-induced microglial activation in BV2 cells

12 Fig. S2. Effect of MAPK inhibitors, EJE on LPS-induced NF- $\kappa$ B signaling in BV2 cells

13

14 Supplementary Figure Legend

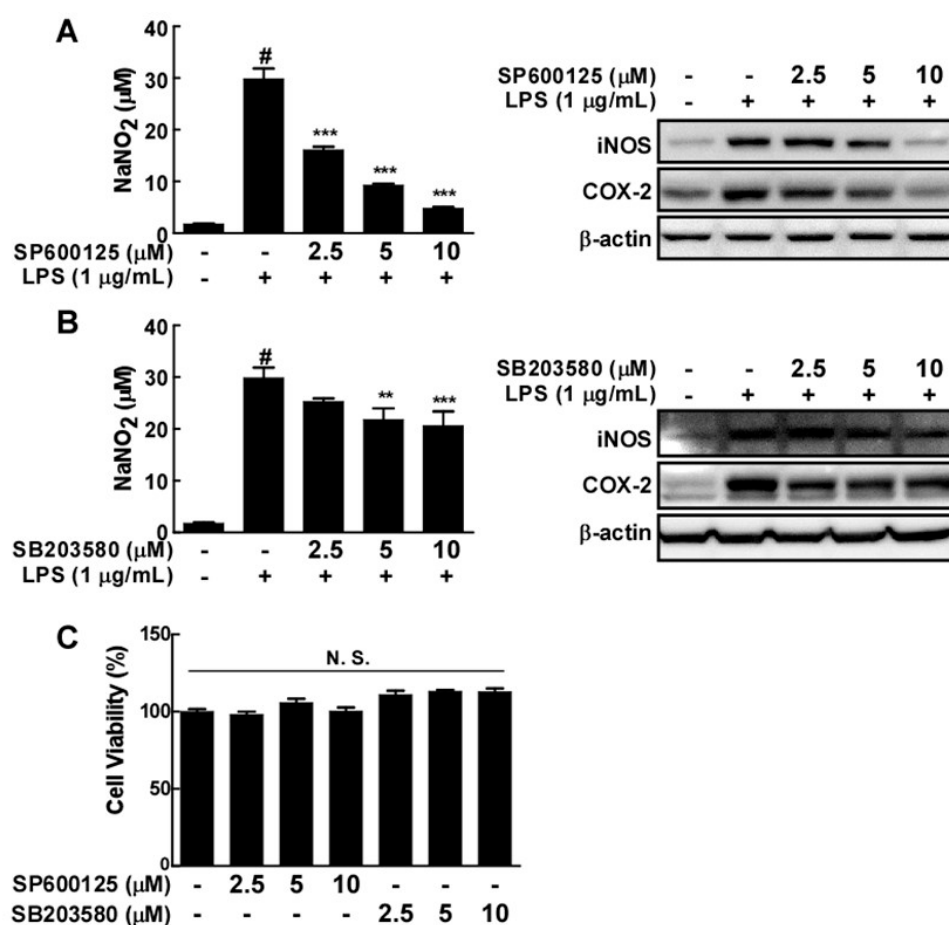

15

16 **Fig. S1.** Effect of MAPK inhibitors on LPS-induced microglial activation in BV2 cells (A) JNK  
 17 inhibition reduced LPS-induced NO production and iNOS, COX2 expression in dose-dependent  
 18 manner. (B) p38 inhibition inhibited LPS-induced NO production and iNOS, COX2 expression in  
 19 dose-dependent manner. (C) The inhibitors didn't affect cell viability. Cell viability were  
 20 investigated with MTS assay, as indicated in the Materials and Methods. Hash symbols (#) indicate a  
 21 significant difference (P < 0.001) between the control group and the group exposed to LPS alone;  
 22 Asterisks (\*\* and \*\*\*) indicate significant differences (P < 0.01 and < 0.001, respectively) between  
 23 groups co-treated LPS and inhibitor and the group exposed to LPS alone. In this and all the following  
 24 Figures, data are presented as the mean ± S.E.M. of three independent experiments.

25

26

27

28

29

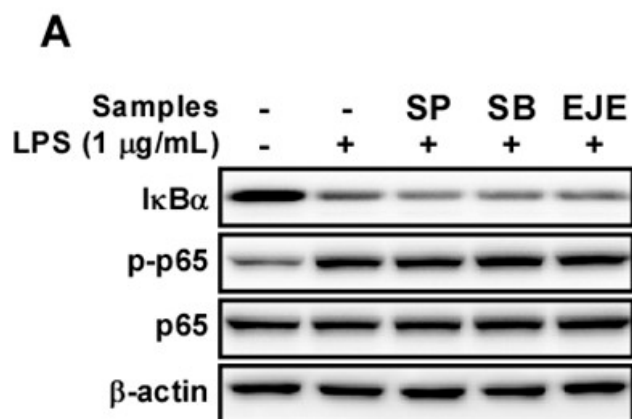

30

31 **Fig. S2.** Effect of MAPK inhibitors, EJE on LPS-induced NF-κB signaling in BV2 cells (A) The treatment of  
 32 JNK, p38 inhibitors and EJE didn't inhibit LPS-induced NF-κB signaling in BV2 cells at 30 mins after LPS  
 33 treatment. SP (SP600125) and SB (SB203580) were treated at concentration of 10 µM. EJE was treated in  
 34 BV2 cells at a concentration of 100 µg/mL. Expression and phosphorylation were detected with each specific  
 35 antibody.
